# Supplementary material
Source: publisher figshare collection journal article supplement (https://karger.figshare.com/ndownloader/files/8663950)

Supplementary Figure 1: This figure was supplied to the raters for assessing MCAGrid. It shows the digital atlas of MCA territory infarction (DA-MCA) in stereotaxic coordinate space. The probability of infarction is displayed in color superimposed on the average  $T_1$ -weighted image in stereotaxic coordinate space. The colour bar refers to the frequency of infarction at each voxel. Stereological grids are overlaid on the DA-MCA to illustrate the grid counting method. For display purpose, only the 2cm grid scale is used.

Supplementary Figure 1

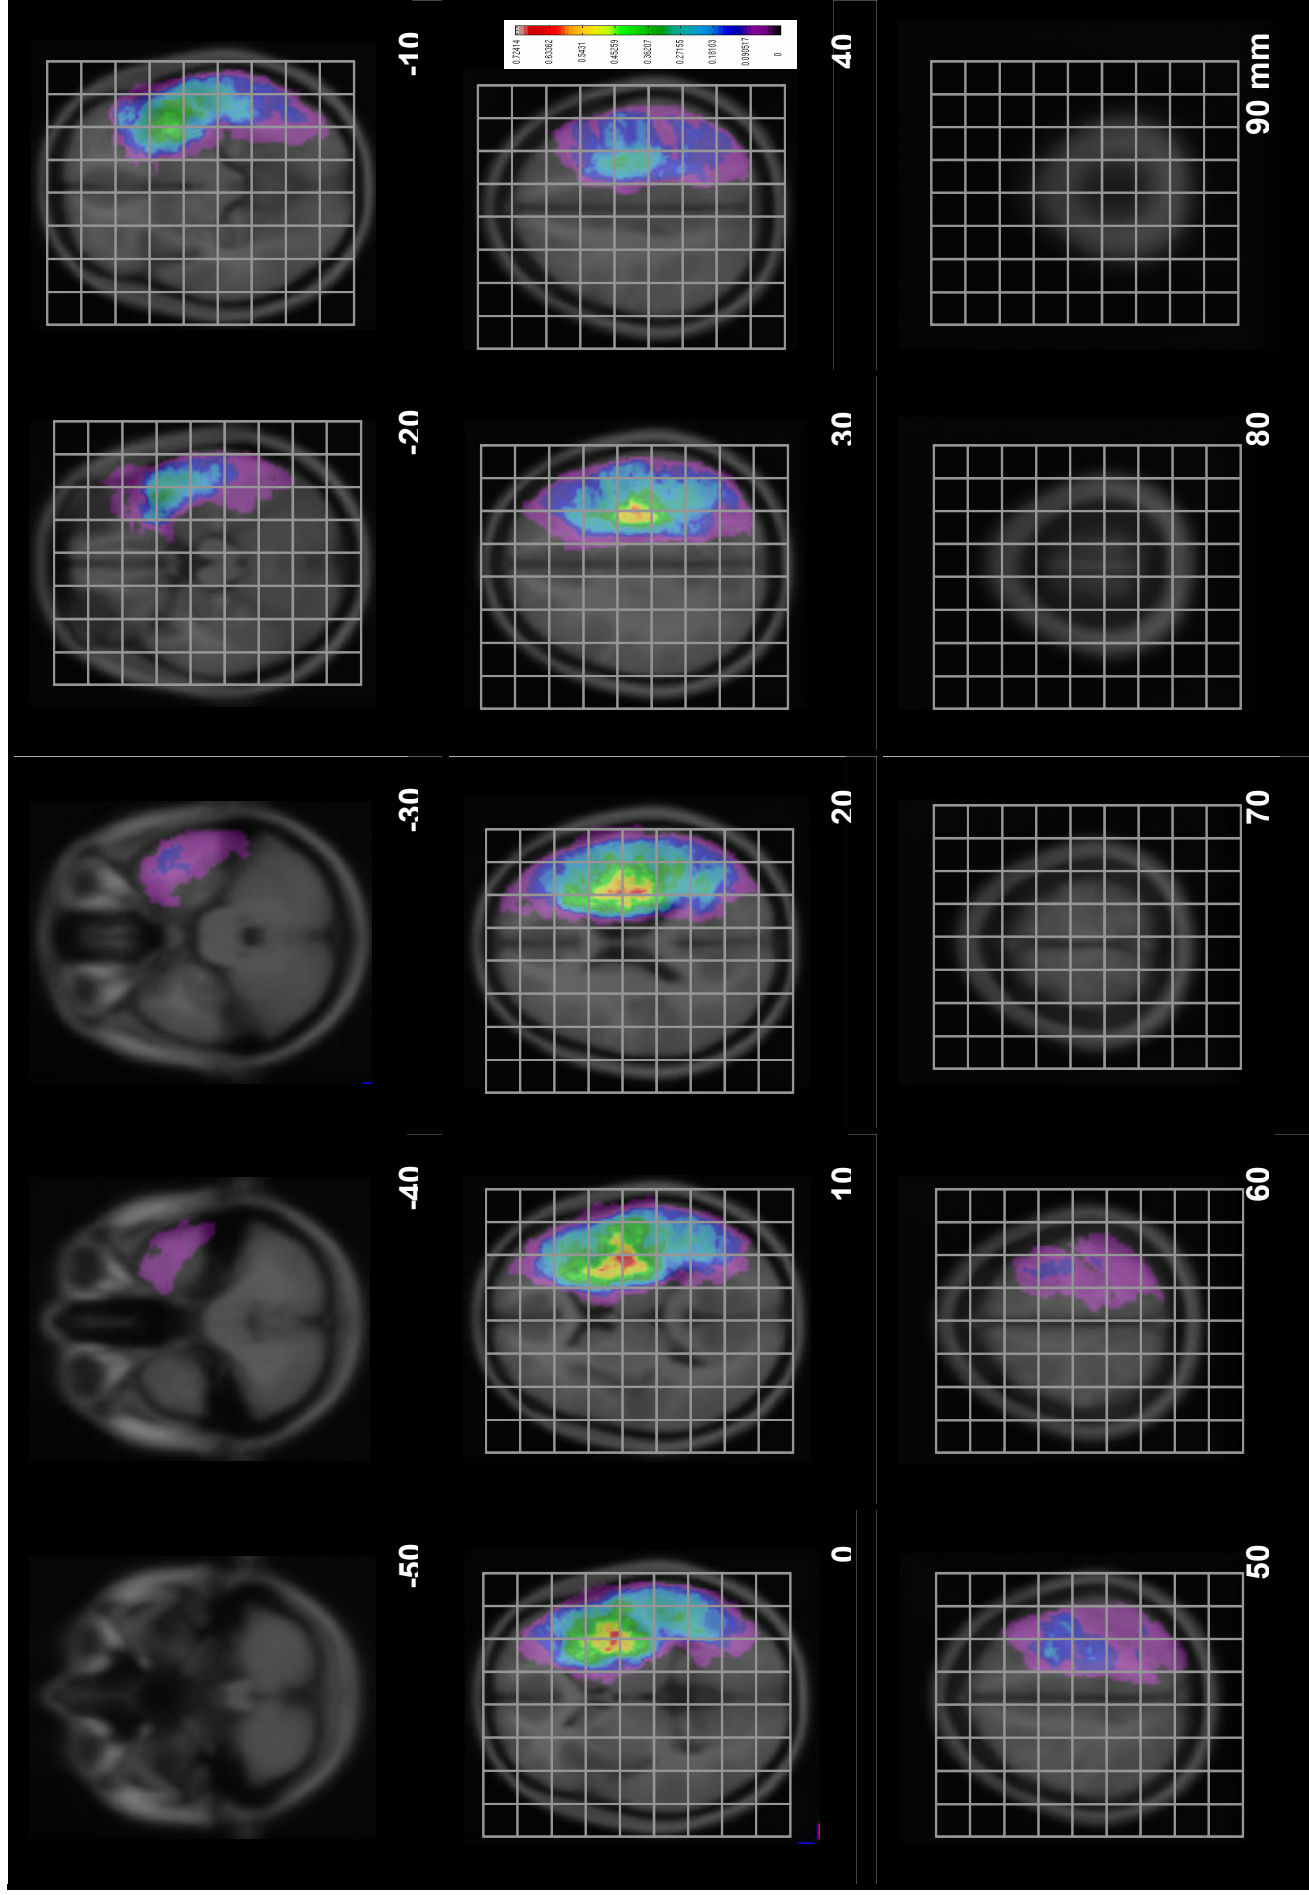

Supplement: Supplementary file 1 [file 8663950]
